# Supplementary material for: Association of Antioxidants Use with All-Cause and Cause-Specific Mortality: A Prospective Study of the UK Biobank
Source: PubMed Central journal article supplement (PMC7766648; doi:10.3390/antiox9121287), 2020-12-16
Supplement: antioxidants-09-01287-s001.pdf [file antioxidants-09-01287-s001.pdf]

# Supplementary Material

## *Antioxidants*

Supplementation of antioxidants is not associated with all-cause and cause-specific mortality risk: A prospective study of the UK Biobank

**Authors:** Inken Behrendt<sup>1,\*</sup>, Gerrit Eichner<sup>2,#</sup> and Mathias Fasshauer<sup>1,3,4,#</sup>

<sup>1</sup> Institute of Nutritional Science, Justus-Liebig University of Giessen, Giessen, Germany

inken.behrendt@ernaehrung.uni-giessen.de (I.B.) mathias.fasshauer@ernaehrung.uni-giessen.de (M.F.)

<sup>2</sup> Mathematical Institute, Justus-Liebig University of Giessen, Giessen, Germany      gerrit.eichner@math.uni-giessen.de

<sup>3</sup> Department of Internal Medicine (Endocrinology, Nephrology, and Rheumatology), University of Leipzig, Leipzig, Germany

<sup>4</sup> Leipzig University Medical Center, IFB AdiposityDiseases, Leipzig, Germany

\* Correspondence: [inken.behrendt@ernaehrung.uni-giessen.de](mailto:inken.behrendt@ernaehrung.uni-giessen.de)

# These authors equally contributed to this work

#These authors contributed equally to this work.

\*Corresponding author. Mailing address: Goethestr. 55, 35390 Giessen, Germany. Phone: +49 641 9939067. Fax: +49 641 9939069. E-mail: [inken.behrendt@ernaehrung.uni-giessen.de](mailto:inken.behrendt@ernaehrung.uni-giessen.de).

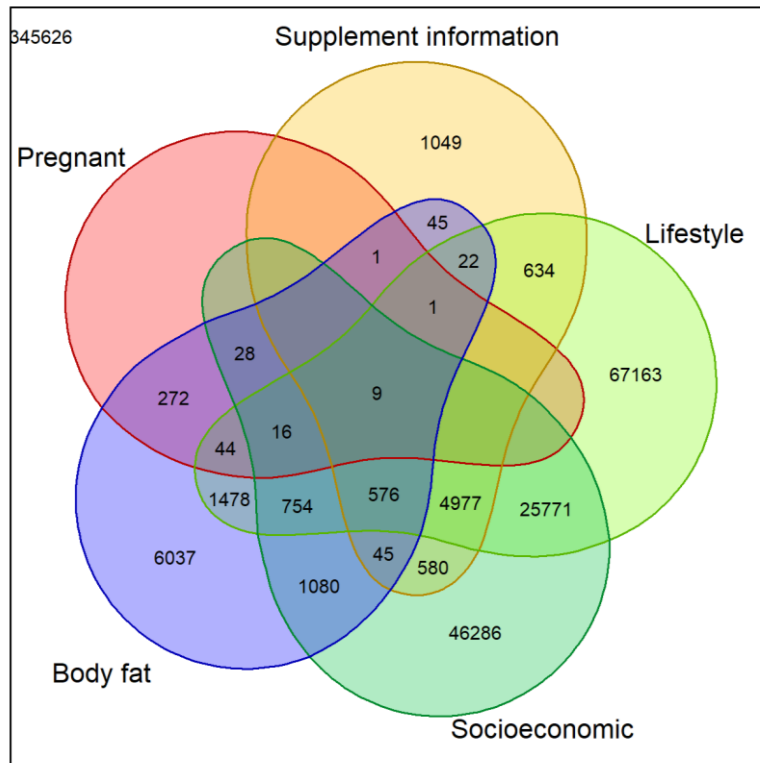

**Figure S1** Venn diagram depicting the number of participants excluded by five exclusion criteria

**Table S1** Association between regular antioxidants use (independent variable) and cause-specific mortality in participant <60 years ( $n = 206,586$ ) and  $\geq 60$  years ( $n = 139,040$ ) of age.<sup>1</sup>

| Cause of death                           | Events | HR   | 95% CI       | <i>p</i> -value <sup>1</sup> |
|------------------------------------------|--------|------|--------------|------------------------------|
| <b>&lt; 60 years of age</b>              |        |      |              |                              |
| <b>All-cause</b>                         | 6032   | -    | -            | -                            |
| Non-users                                | 4360   | 1.00 | -            | -                            |
| Users                                    | 1672   | 1.01 | (0.95, 1.07) | 0.7157                       |
| <b>Cancer</b>                            | 3506   | -    | -            | -                            |
| Non-users                                | 2521   | 1.00 | -            | -                            |
| Users                                    | 985    | 0.99 | (0.92, 1.06) | 0.7164                       |
| <b>Non-cancer</b>                        | 2526   | -    | -            | -                            |
| Non-users                                | 1839   | 1.00 | -            | -                            |
| Users                                    | 687    | 1.05 | (0.96, 1.15) | 0.2793                       |
| <b><math>\geq 60</math> years of age</b> |        |      |              |                              |
| <b>All-cause</b>                         | 13,459 | -    | -            | -                            |
| Non-users                                | 9742   | 1.00 | -            | -                            |
| Users                                    | 3717   | 0.96 | (0.92, 0.99) | <b>0.0234</b>                |
| <b>Cancer</b>                            | 7274   | -    | -            | -                            |
| Non-users                                | 5185   | 1.00 | -            | -                            |
| Users                                    | 2089   | 0.99 | (0.94, 1.04) | 0.6976                       |
| <b>Non-cancer</b>                        | 6185   | -    | -            | -                            |
| Non-users                                | 4557   | 1.00 | -            | -                            |
| Users                                    | 1628   | 0.92 | (0.87, 0.97) | <b>0.0034</b>                |

<sup>1</sup>P for all models overall: <0.0001. All models were adjusted for age, sex, smoking status, alcohol intake, income, qualifications, ethnic background, physical activity, and percentage body fat. Abbreviations: CI, Confidence interval; HR, Hazard ratio.
